# Supplementary material for: Early alpha-lipoic acid therapy protects from degeneration of the inner retinal layers and vision loss in an experimental autoimmune encephalomyelitis-optic neuritis model
Source: Springer Nature journal article supplement (doi:10.1186/s12974-018-1111-y), 2018-03-07
Supplement: MOESM1 [file 15516848]

**Table S1** Advised Protocol for OCT Study Terminology and Elements (APOSTEL) checklist; each item discussed in the manuscript on the indicated page.

| Item | Recommendation                 | Page                                                                                                                                                        |       |
|------|--------------------------------|-------------------------------------------------------------------------------------------------------------------------------------------------------------|-------|
| 1    | Study protocol                 | Describe how many OCT operating sites and graders were included                                                                                             | 1, 13 |
|      |                                | Report the timing of OCT compared to other measurements (same day, delayed)                                                                                 | 8     |
|      |                                | Describe the inclusion and exclusion criteria (here: strain, gender, age)                                                                                   | 4     |
| 2    | Acquisition device             | For all OCT devices used, report data on:                                                                                                                   |       |
|      |                                | Manufacturer                                                                                                                                                | 4     |
|      |                                | Model                                                                                                                                                       | 4     |
|      |                                | Version                                                                                                                                                     | 4     |
| 3    | Acquisition Settings           | Clearly describe the settings in which OCT scans were obtained:                                                                                             |       |
|      |                                | Room light conditions                                                                                                                                       | 4     |
|      |                                | Pupils dilated before examination (y/n)                                                                                                                     | 4     |
|      |                                | Number of operators and devices                                                                                                                             | 4, 13 |
| 4    | Scanning protocol              | Clearly describe the scanning protocol, including:                                                                                                          |       |
|      |                                | Type of scan (circular, volume, star, line, other)                                                                                                          | 5     |
|      |                                | Location (area of interest, macula, optic nerve head, papillomacular bundle, other?)                                                                        | 5     |
|      |                                | Scan parameters (with or without eye tracking)                                                                                                              | 5     |
|      |                                | Volume scan: size of scan area (degrees or millimeters), number of B-scans, alignment of B-scans, number of A-scans per B-scan                              | 5     |
|      |                                | Radial scan: size of scan area (degrees or millimeters), number of B-scans, alignment of B-scans, number of A-scans per B-scan                              | n. a. |
|      |                                | Ring scan: diameter, A-scans/B-scan, manual or automatic placement of ring or method of centering, depth resolution                                         | n. a. |
| 5    | Funduscopy imaging             | Report other imaging modalities used in addition to OCT (funduscopy, confocal scanning laser ophthalmoscopy, retinal angiography, autofluorescence imaging) | n. a. |
|      |                                | Describe acquisition protocol, including:                                                                                                                   |       |
|      |                                | Excitation wavelength                                                                                                                                       | n. a. |
|      |                                | Filter sets                                                                                                                                                 | n. a. |
|      |                                | Number of frames averaged (if applicable)                                                                                                                   | n. a. |
| 6    | Postacquisition data selection | Describe image selection process, including:                                                                                                                |       |
|      |                                | Quality control criteria (i.e., OSCAR-IB or other criteria)                                                                                                 | 5     |
|      |                                | Postacquisition discard (number and criteria)                                                                                                               | n.a.  |
| 7    | Postacquisition analysis       | Describe all postacquisition steps:                                                                                                                         |       |
|      |                                | Software used for processing scans and segmentation (may be different from acquisition software)                                                            | 5     |

|   |                                |                                                                               |   |
|---|--------------------------------|-------------------------------------------------------------------------------|---|
|   |                                | Which individual retinal layers were segmented/included                       | 5 |
|   |                                | Method of segmentation (automated, semiautomated, or manually)                | 5 |
|   |                                | How potential bias was addressed in the case of manual segmentation (masking) | 5 |
|   |                                | Grid used for data extraction (size, shape, selected sections)                | 5 |
| 8 | Nomenclature and abbreviations | Define:                                                                       |   |
|   |                                | Anatomical structures analyzed                                                | 5 |
|   |                                | Units of provided measurements (e.g., volume or thickness)                    | 5 |
| 9 | Statistical approach           | Describe:                                                                     |   |
|   |                                | Statistical models used for the analyses of OCT data                          | 7 |
|   |                                | Whether data were analyzed by eye or by patient                               | 7 |

Abbreviation: n. a. = not applicable
