# Supplementary material for: Early alpha-lipoic acid therapy protects from degeneration of the inner retinal layers and vision loss in an experimental autoimmune encephalomyelitis-optic neuritis model
Source: Springer Nature journal article supplement (doi:10.1186/s12974-018-1111-y), 2018-03-07
Supplement: MOESM3 [file 15516848]

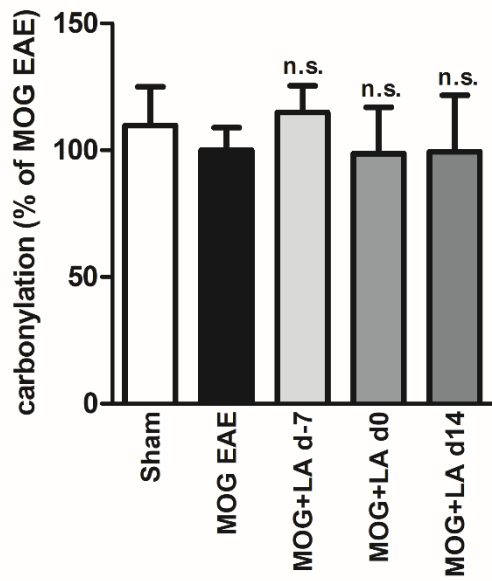

**Figure S2** The carbonylation of proteins did not change 120 days after EAE immunization. The bar graphs represent the pooled mean  $\pm$  standard deviation of at least three separate EAE experiments each with at least three animals per group (n.s. = not significant, by ANOVA with Dunnett's post hoc test compared to MOG untreated mice)
