# Supplementary material for: Early alpha-lipoic acid therapy protects from degeneration of the inner retinal layers and vision loss in an experimental autoimmune encephalomyelitis-optic neuritis model
Source: Springer Nature journal article supplement (doi:10.1186/s12974-018-1111-y), 2018-03-07
Supplement: MOESM4 [file 15516848]

**Figure S3** Optic nerves of sham-EAE, MOG-EAE and MOG-EAE with therapeutic LA treated mice were compared for microglia activation by fluorescence intensity measurement (a), by a CD3 score for T-cell Infiltration (b) and by a MBP myelination score for myelin status (c); quantitative analyses of the results of three independent EAE experiments with at least four mice are shown as bar graphs; one ON per mouse was included. (\*\*\*) $p < 0.001$ , n.s. = not significant, by ANOVA with Dunnett's post hoc test compared to MOG untreated mice)
